# Supplementary material for: Differential contribution of p300 and CBP to regulatory element acetylation in mESCs
Source: PubMed Central journal article supplement (PMC7370441; doi:10.1186/s12860-020-00296-9), 2020-07-20

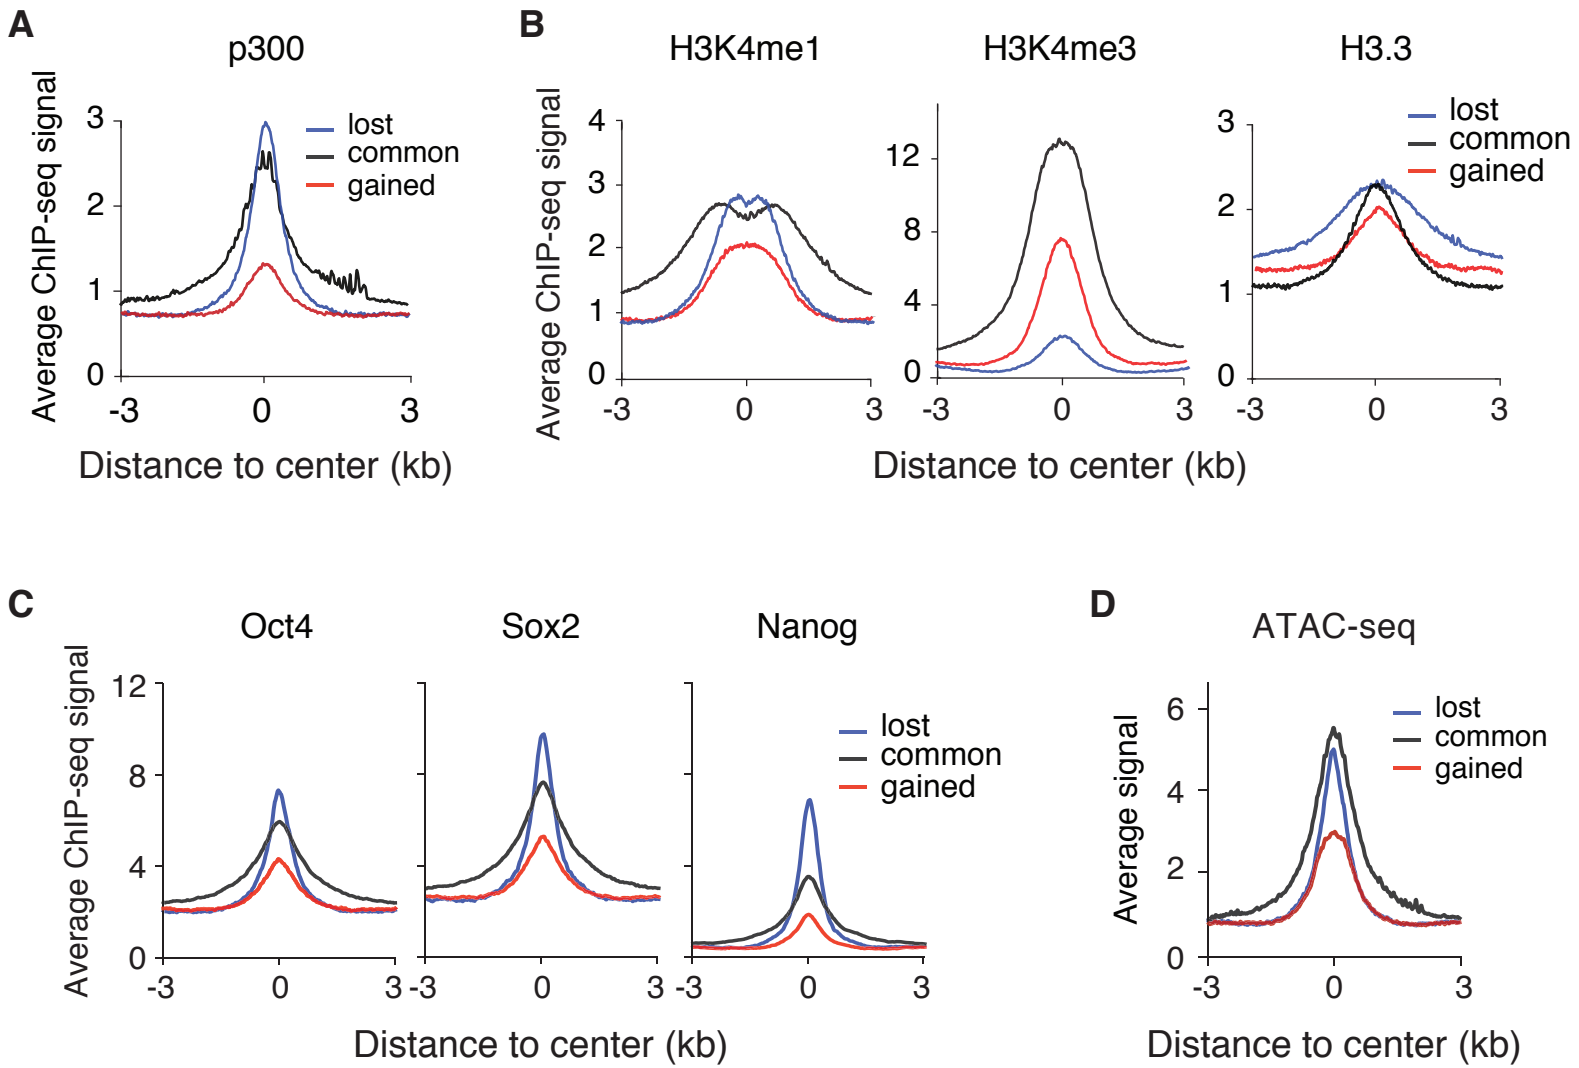

Supplement: 12860_2020_296_MOESM4_ESM.pdf [file 12860_2020_296_MOESM4_ESM.pdf]
